# Supplementary material
Source: Research Square preprint supplement (doi:10.21203/rs.3.rs-8788799/v1)
Supplement: Supplementary file 1 [file c51d09e2019cfdb07101f9e3.docx]

## SUPPLEMENTAL MATERIAL 1

This supplemental material presents the questionnaires used in the present study in two sections: one for grades 1-3 (children aged ~7-9 years) and one for grades 4-6 (children aged ~10-12 years).

The questions presented in this supplemental material are translated from Danish into English for the reader’s understanding; therefore, the translation of the questionnaire has not been checked or validated.

The full set of items is presented below; items not used in the present manuscript are shown with strikethrough.

**Grades 1-3**

- Physical literacy questionnaire (MyPL) is a video-assisted questionnaire. MyPL is a Danish questionnaire that measures physical literacy in specific contexts and consists of five subscales for different activities (1).
- Other questions used in the present study:

**Do you eat fruit and vegetables?**

| Yes, every day | Yes, sometimes | Seldom |
| --- | --- | --- |
|  |  |  |

**Do you play sports in a club?
This could be football, handball, swimming, karate, badminton, dancing, horseback riding, or similar activities.**

| Yes | No, not at the moment |
| --- | --- |
|  |  |

**Grades 4-6**

- Physical literacy questionnaire (MyPL) is a video-assisted questionnaire. MyPL is a Danish questionnaire that measures physical literacy in specific contexts and consists of five subscales for different activities. (1)
- KIDSCREEN-27 - Health-Related Quality of Life Questionnaire for Children (Danish version). The KIDSCREEN-27 is a 27-item questionnaire that assesses children's self-rated physical well-being, psychological well-being, autonomy and parent relations, peers and social support, and school environment (2, 3).
- The Three-Item Loneliness Scale (T-ILS) Questionnaire. The T-ILS consists of three items. Each item is assessed using a 3-point Likert scale (4)
- Smartphone addiction questionnaire. Five-item questionnaire on smartphone addiction. Each item is assessed using a 5-point Likert scale (5):

**To what extent do you agree with the following statements?**

|  | **Strongly agree** | **Agree** | **Neither agree nor disagree** | **Disagree** | **Strongly disagree** |
| --- | --- | --- | --- | --- | --- |
| I often check my phone without thinking about it |  |  |  |  |  |
| When my phone beeps or vibrates, I feel an urge to check it |  |  |  |  |  |
| It often happens that I get absorbed in social media and lose track of time and place |  |  |  |  |  |
| I don't like being away from my phone |  |  |  |  |  |
| I often find it difficult to relax or fall asleep after using my phone or computer for a long time |  |  |  |  |  |

- Other questions used in the present study (the full set of items is presented below; items not used in the present manuscript are shown with strikethrough):

**Indicate how often you do the following in your leisure time?**
Please tick one box on each line.

|  | Several times a week | Once a week | 2–3 times a month | Once a month | Rarely or never |
| --- | --- | --- | --- | --- | --- |
| Do sports in a club or association (e.g., football, handball, swimming, horseback riding) |  |  |  |  |  |
| Exercise or do sports outside a club or fitness center (e.g., running, skating, street basketball, trampoline) |  |  |  |  |  |
| ~~Participate in e-sports in a club or association~~ |  |  |  |  |  |
| ~~Attend theatre, music, scouts, role-playing, chess or similar activities (e.g., in an association)~~ |  |  |  |  |  |
| ~~Go to a youth club (e.g., junior club)~~ |  |  |  |  |  |

**How often do you engage in the following activities on your mobile phone, tablet, computer, or gaming console during your leisure time?**
Please tick one box on each line.

|  | Many times a day | A few times a day | Once a day | Several times a week | A few times a month | Rarely / never |
| --- | --- | --- | --- | --- | --- | --- |
| ~~Contact friends~~ |  |  |  |  |  |  |
| ~~Contact family~~ |  |  |  |  |  |  |
| ~~Play games~~ |  |  |  |  |  |  |
| ~~Use social media~~ |  |  |  |  |  |  |
| ~~Listen to music~~ |  |  |  |  |  |  |
| Watch YouTube, series, or movies |  |  |  |  |  |  |

**Think about a normal week. How often…**
Please tick one box on each line.

|  | Every day | 5–6 days a week | 3–4 days a week | 1–2 days a week | Rarely or never |
| --- | --- | --- | --- | --- | --- |
| …do you eat fruit? |  |  |  |  |  |
| …do you eat vegetables? |  |  |  |  |  |
| ~~…do you eat fish?~~ |  |  |  |  |  |
| ~~…do you eat meat?~~ |  |  |  |  |  |
| ~~…do you consume dairy products from a cow (e.g., milk, cheese, butter, yogurt)?~~ |  |  |  |  |  |

**How often do you drink soft drinks or cocoa?**

| • | Seldom or never |
| --- | --- |
| • | 1–2 days a week |
| • | 3–4 days a week |
| • | 5–6 days a week |
| • | Every day |

**REFERENCES**

1. Elsborg P, Melby PS, Kurtzhals M, Kirkegaard H, Carl J, Rask S, et al. From Global Domains to Physical Activity Environments: Development and Initial Validation of a Questionnaire-Based Physical Literacy Measure Designed for Large-Scale Population Surveys. Measurement in Physical Education and Exercise Science. 2024;28(2):206-23.

2. KIDSCREEN-27 [cited 2025 July 10th]. Available from: <https://www.kidscreen.org/english/questionnaires/kidscreen-27/>.

3. Ravens-Sieberer U, Herdman M, Devine J, Otto C, Bullinger M, Rose M, et al. The European KIDSCREEN approach to measure quality of life and well-being in children: development, current application, and future advances. Qual Life Res. 2014;23(3):791-803.

4. Hughes ME, Waite LJ, Hawkley LC, Cacioppo JT. A Short Scale for Measuring Loneliness in Large Surveys: Results From Two Population-Based Studies. Res Aging. 2004;26(6):655-72.

5. Algoritmer, Data & Demokrati (ADD-projektet). Børns digitale liv. En undersøgelse af børn og unges viden om, holdninger til og adfærd i deres digitale liv [Children’s Digital Lives: A Study of Children’s and Adolescents’ Knowledge, Attitudes, and Behaviour in Their Digital Lives]. 2023 [cited 2025 September 10th]. Available from: <https://algoritmer.org/boerns-digitale-liv/>.
